# Supplementary material for: Antioxidant and Mitochondria-Targeted Activity of Caffeoylquinic-Acid-Rich Fractions of Wormwood (Artemisia absinthium L.) and Silver Wormwood (Artemisia ludoviciana Nutt.)
Source: MDPI journal article supplement (doi:10.3390/antiox10091405), 2021-09-01
Supplement: s1 [file s1]

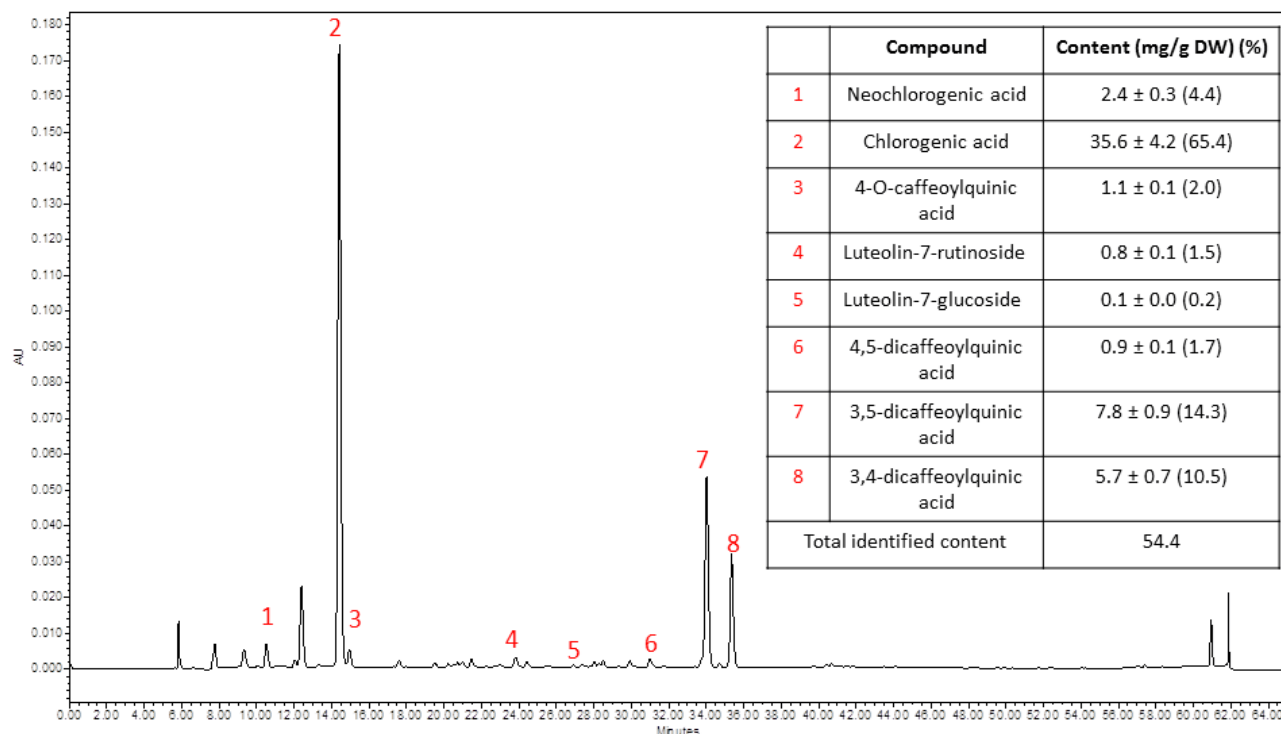

**Figure S1.** HPLC-PDA profiles at 320 nm, showing phenolics separation in the total acetone extract of wormwood herb.

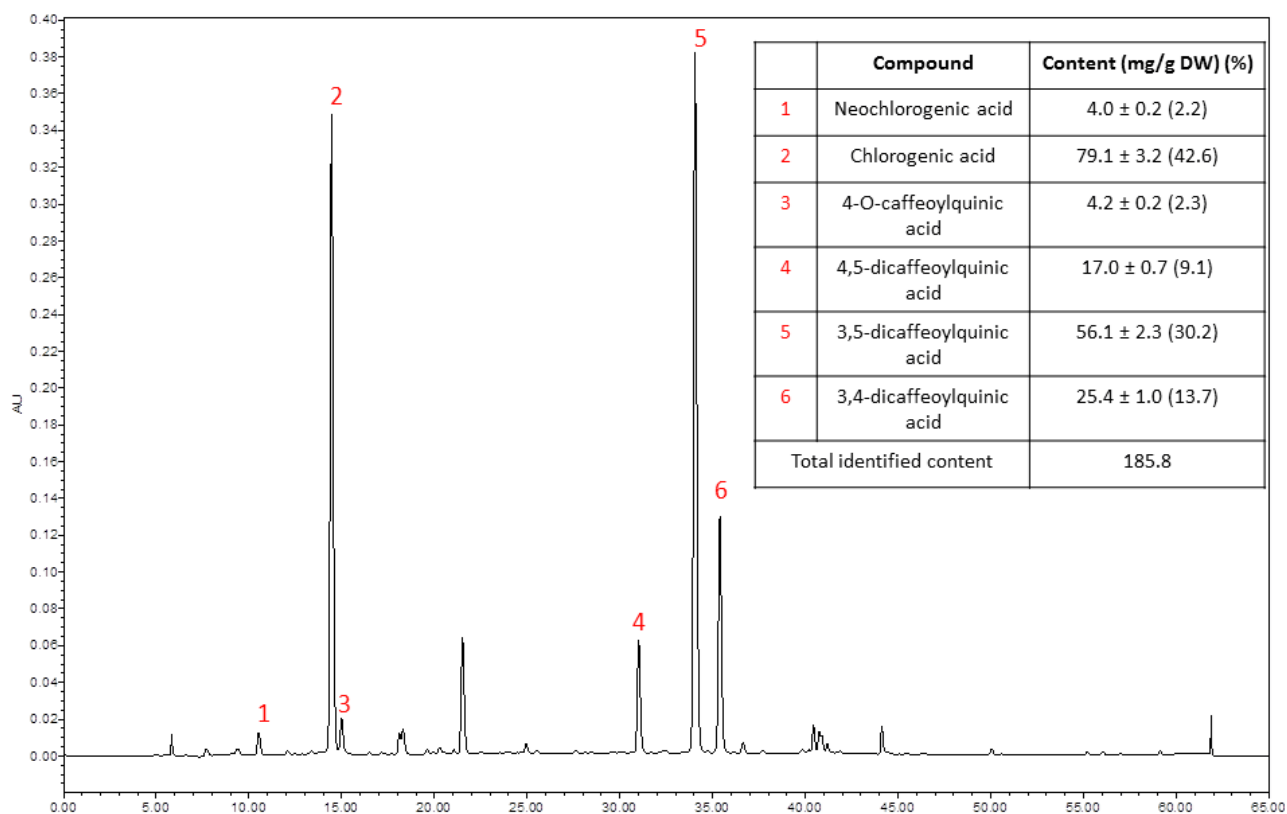

**Figure S2.** HPLC-PDA profiles at 320 nm, showing phenolics separation in the total acetone extract of silver wormwood herb.

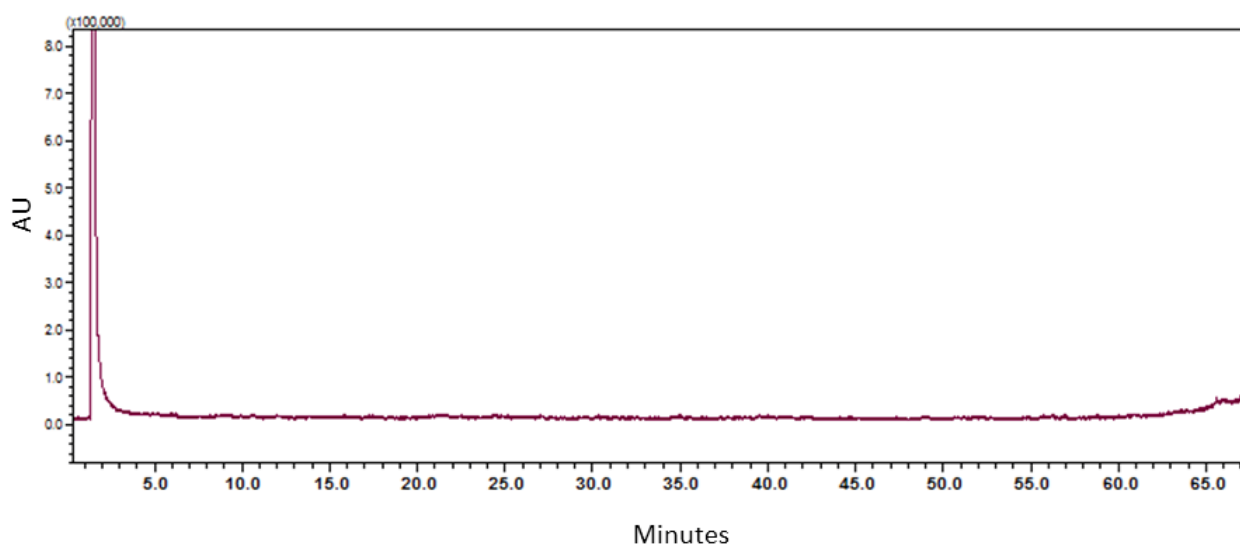

**Figure S3.** Example GC-MS profile of caffeoylquinic acid-rich fractions from wormwood and silver wormwood herb acetone extracts.

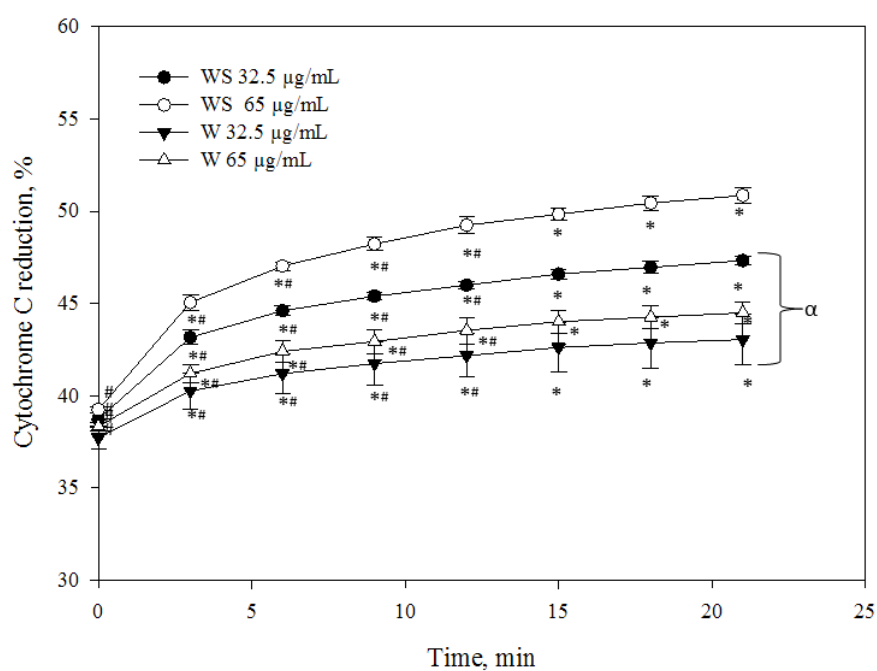

**Figure S4.** Effect of acetone extracts from wormwood (W) and silver wormwood (WS) herb on cytochrome c reduction. \*  $p < 0.05$  vs. at 0 min time; #  $p < 0.05$  vs. at 21 min time;  $\alpha$   $p < 0.05$  vs. 65  $\mu\text{g/mL}$  acetone extract from silver wormwood herb. WS marked acetone extract from silver wormwood herb, at 32.5  $\mu\text{g/mL}$  of WS the end concentration of compounds was consisted of 2572.32  $\pm$  104.08 ng/mL chlorogenic acid, 131.62  $\pm$  5.33 ng/mL neochlorogenic acid, 136.80  $\pm$  5.54 ng/mL 4-O-caffeoylquinic acid, 552.87  $\pm$  22.37 ng/mL 4,5-dicaffeoylquinic acid, 825.28  $\pm$  33.39 ng/mL 3,4-dicaffeoylquinic acid, 1823.48  $\pm$  73.78 ng/mL 3,5-dicaffeoylquinic acid. At 65  $\mu\text{g/mL}$  of WS the end concentration of compounds was consisted of 5144.64  $\pm$  208.17 ng/mL chlorogenic acid, 263.25  $\pm$  10.65 ng/mL neochlorogenic acid, 273.60  $\pm$  11.07 4-O-caffeoylquinic acid, 1105.74  $\pm$  44.74 ng/mL 4,5-dicaffeoylquinic acid, 1650.56  $\pm$  66.79 ng/mL 3,4-dicaffeoylquinic acid, 3646.97  $\pm$  147.57 ng/mL 3,5-dicaffeoylquinic acid. W marked acetone extract from wormwood herb, at 32.5  $\mu\text{g/mL}$  of W the end concentration of compounds was consisted of 1155.71  $\pm$  136.39 ng/mL chlorogenic acid, 77.57  $\pm$  9.16 ng/mL neochlorogenic acid, 34.58  $\pm$  4.08 ng/mL 4-O-caffeoylquinic acid, 30.44  $\pm$  3.59 ng/mL 4,5-dicaffeoylquinic acid, 184.76  $\pm$  21.80 ng/mL 3,4-dicaffeoylquinic acid,

254.03  $\pm$  29.98 ng/mL 3,5-dicaffeoylquinic acid, 4.25  $\pm$  0.50 ng/mL luteolin-7-glucoside, 38.83  $\pm$  4.58 ng/mL luteolin-7-rutenoside. At 65  $\mu$ g/mL of W the end concentration of compounds was consisted of 2311.42  $\pm$  272.79 ng/mL chlorogenic acid, 155.15  $\pm$  18.31 ng/mL neochlorogenic acid, 69.16  $\pm$  8.16 ng/mL 4-O-caffeoylquinic acid, 60.88  $\pm$  7.19 ng/mL 4,5-dicaffeoylquinic acid, 369.52  $\pm$  43.61 ng/mL 3,4-dicaffeoylquinic acid, 508.06  $\pm$  59.96 ng/mL 3,5-dicaffeoylquinic acid, 8.50  $\pm$  1.00 ng/mL luteolin-7-glucoside, 77.66  $\pm$  9.17 ng/mL luteolin-7-rutinoside.

**Table S1.** Total phenol content of total acetone extract, aqua and methanol fractions from the herb of wormwood and silver wormwood by HPLC-PDA method.

| Extract                | Total identified phenolic mg/g DW |                        |
|------------------------|-----------------------------------|------------------------|
|                        | <b>Wormwood</b>                   | <b>Silver wormwood</b> |
| <b>Acetone (total)</b> | 54.4                              | 185.8                  |
| <b>Aqua</b>            | 72.8                              | 157.8                  |
| <b>Methanol</b>        | 325.1                             | 655.8                  |
